# Supplementary material for: Croton lechleri Extracts as Green Corrosion Inhibitors of Admiralty Brass in Hydrochloric Acid
Source: MDPI journal article supplement (doi:10.3390/molecules26247417), 2021-12-07
Supplement: s1 [file s1]

## SUPPLEMENTARY MATERIALS

### ***Croton Lechleri* Extracts as Green Corrosion Inhibitors of Admiralty Brass in Hydrochloric Acid**

**Carlos Cevallos-Morillo <sup>1</sup>, Pablo Cisneros-Pérez <sup>2</sup>, Roxana Llive <sup>2</sup>, Marvin Ricaurte <sup>3</sup>, Carlos Reinoso <sup>4</sup>, Miguel Angel Meneses <sup>5</sup>, Maria del Cisne Guamán <sup>5</sup>, and Alex Palma-Cando <sup>3,\*</sup>**

<sup>1</sup> Facultad de Ciencias Químicas, Universidad Central del Ecuador, Francisco Viteri s/n y Gato Sobral, 170129 Quito, Ecuador; cacevallosm@uce.edu.ec

<sup>2</sup> Universidad Regional Amazónica Ikiam, Tena, Napo, Ecuador; pablo.cisneros@ikiam.edu.ec (P.C.-P.); Roxana.llive@ikiam.edu.ec. (R.L.)

<sup>3</sup> Yachay Tech University, School of Chemical Sciences and Engineering, Grupo de Investigación Aplicada en Materiales y Procesos (GIAMP), Hda. San José s/n y Proyecto Yachay, 100119 Urcuquí, Ecuador; mricaurte@yachaytech.edu.ec (M.R.); apalma@yachaytech.edu.ec (A.P.-C.)

<sup>4</sup> Yachay Tech University, School of Physical Sciences and Nanotechnology, Hda. San José s/n y Proyecto Yachay, 100119 Urcuquí, Ecuador; creinoso@yachaytech.edu.ec (C.R.)

<sup>5</sup> Departamento de Química y Ciencias Exactas, Universidad Técnica Particular de Loja, Loja 110150, Ecuador; mameneses@utpl.edu.ec (M.A.M.); mcguaman@utpl.edu.ec (M.C.G.-B.)

\* Correspondence: apalma@yachaytech.edu.ec

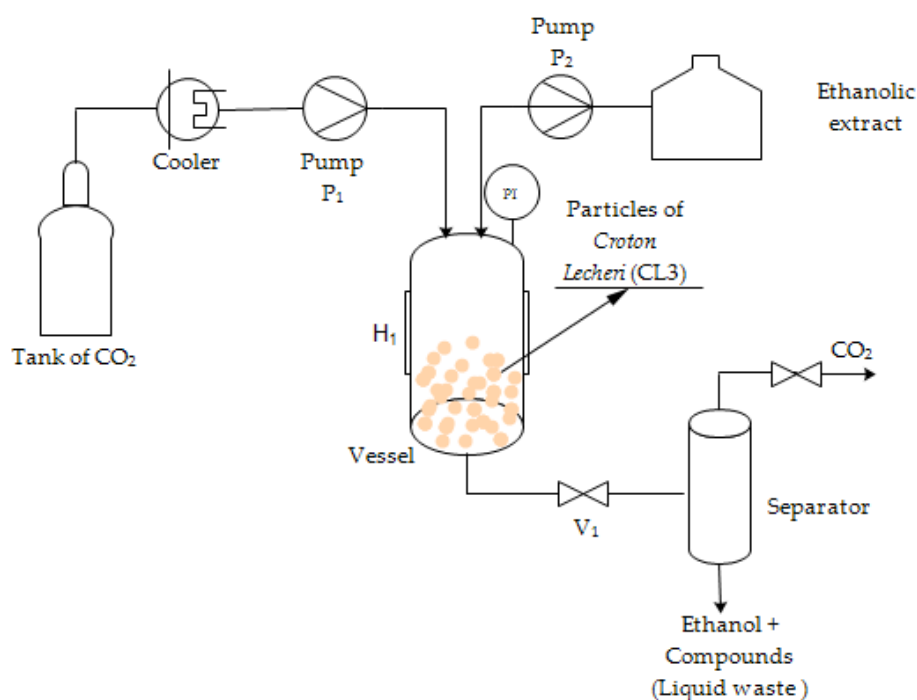

**Figure S1.** Pilot plant of supercritical CO<sub>2</sub> antisolvent extraction of CL3.

A home-made pilot plant was used in this study, the schematic diagram is shown in Figure S9. The equipment consisted in one tank of CO<sub>2</sub> and a cooler, two pumps, one for CO<sub>2</sub> (P1) and the other for the liquid extract (P2). These two flow currents mixed at a heated jacketed (H1) 250 mL precipitator vessel connected to a pressure gauge (PI). A micrometric valve (V1) allowed to control flux to the separator where CO<sub>2</sub> (g) was released from the ethanolic waste mixture. The values of the parameters used are shown in Table S1.

**Table S1.** Conditions of supercritical CO<sub>2</sub> antisolvent extraction of CL3.

| Pressure (bar) | Temperature (°C) | Concentration of the extract (mg/mL) | Flow of CO <sub>2</sub> (mL/min) | Time of wash (min) |
|----------------|------------------|--------------------------------------|----------------------------------|--------------------|
| 90             | 35               | 30                                   | 10000                            | 60                 |

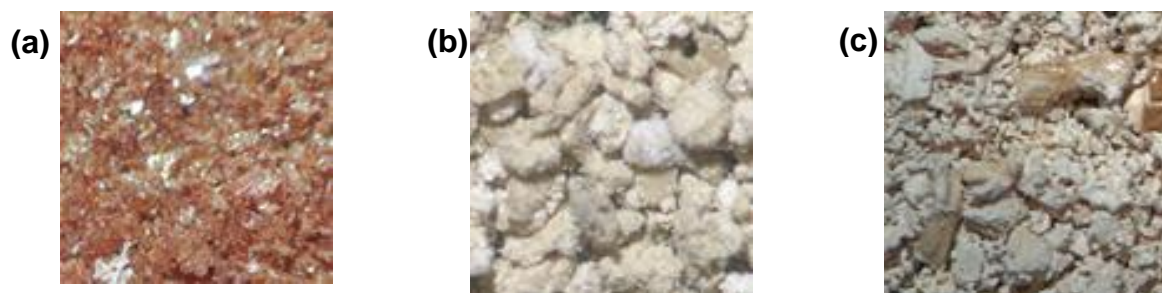

**Figure S2.** Photographs of solid extracts obtained from *C. lecheri* by (a) lyophilization, (b) solvent extraction, and (c) supercritical CO<sub>2</sub> antisolvent extraction.

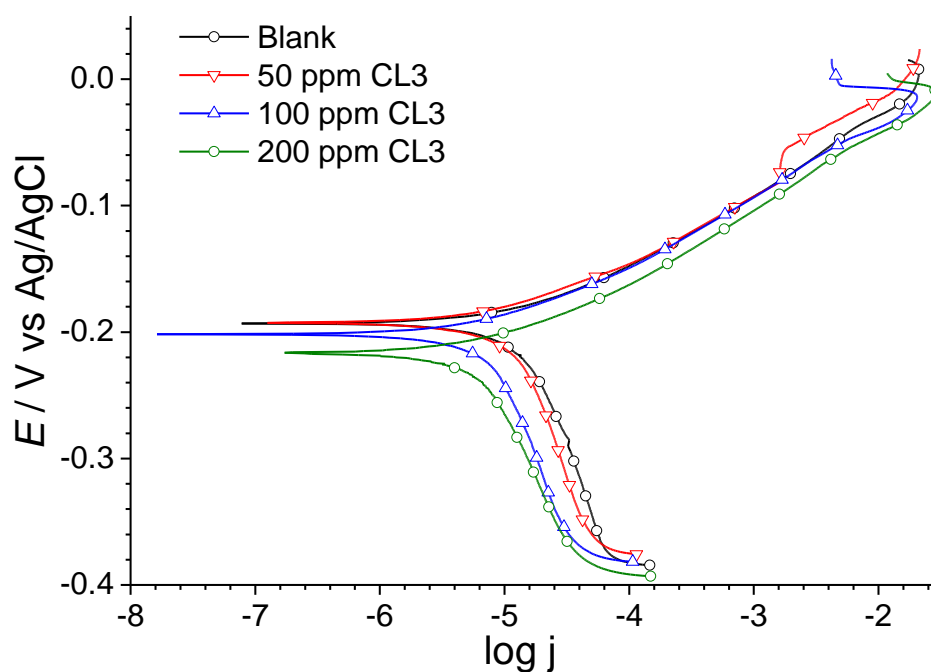

**Figure S3.** Potentiodynamic polarization plots of AB in 0.5 M HCl in the presence of CL3 at several concentrations at 25°C.

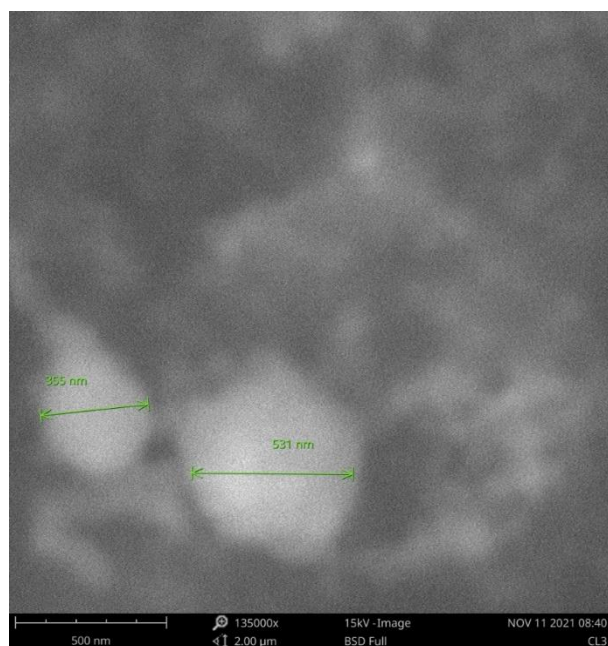

**Figure S4.** Microphotography of CL3 spherical particles.

**Table S2.** Tafel polarization parameters for AB in 0.5 M HCl with CL3 at concentrations of 50 ppm-200 ppm at 25°C.

| Entry       | $E_{\text{corr}}$ (V) | $\beta_c$ (mV/dec) | $\beta_a$ (mV/dec) | $j_{\text{corr}}$ ( $\mu\text{A}/\text{cm}^2$ ) | IE%   |
|-------------|-----------------------|--------------------|--------------------|-------------------------------------------------|-------|
| Blank       | -0.193                | 281.6              | 53.8               | 14.84                                           | -     |
| 50 ppm      | -0.194                | 360.5              | 53.1               | 13.13                                           | 11.56 |
| CL2 100 ppm | -0.202                | 308.5              | 45.5               | 8.95                                            | 39.72 |
| 200 ppm     | -0.214                | 238.0              | 47.5               | 7.58                                            | 48.93 |

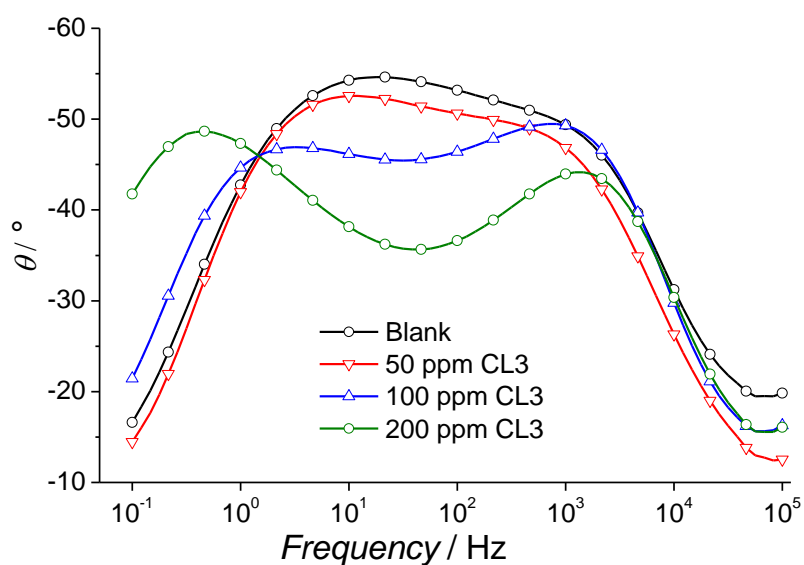

**Figure S5.** Bode diagrams of AB at  $E_{\text{corr}}$  in 0.5 M HCl at various concentrations of CL3.

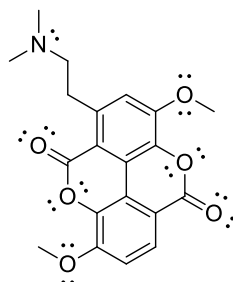

**Figure S6.** Chemical structure of tapsine.

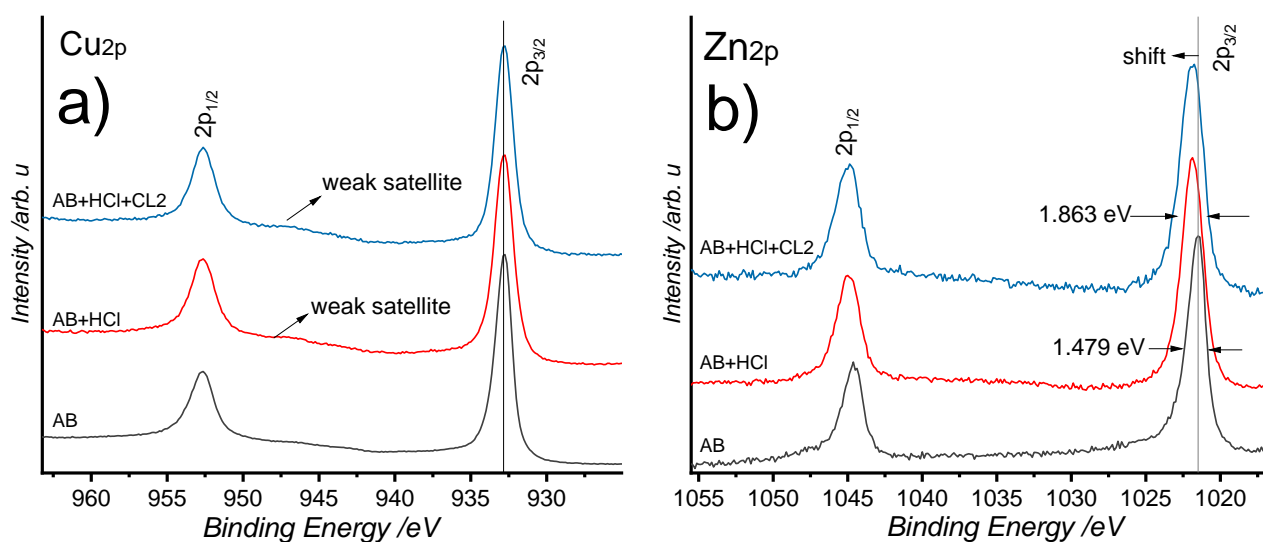

**Figure S7.** (a) Cu2p and (b) Zn2p XPS spectra for a polished admiralty brass (black line), admiralty brass after immersion in 0.5 M HCl (red line), and admiralty brass after immersion in 0.5 M HCl with 50 ppm CL2 (blue line).

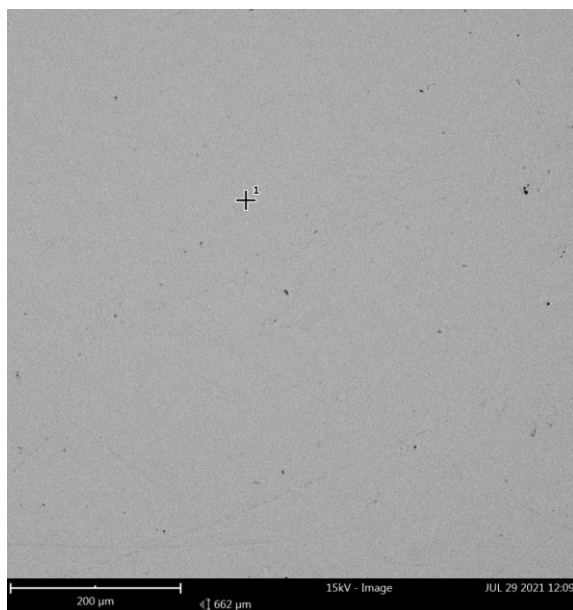

| Element Symbol | Atomic Conc. | Weight Conc. | Oxide Symbol | Stoich. Conc. |
|----------------|--------------|--------------|--------------|---------------|
| Cu             | 70.58        | 69.99        | Cu           | 70.58         |
| Zn             | 29.42        | 30.01        | Zn           | 29.42         |

FOV: 662 μm, Mode: 15kV - Image, Detector: BSD Full

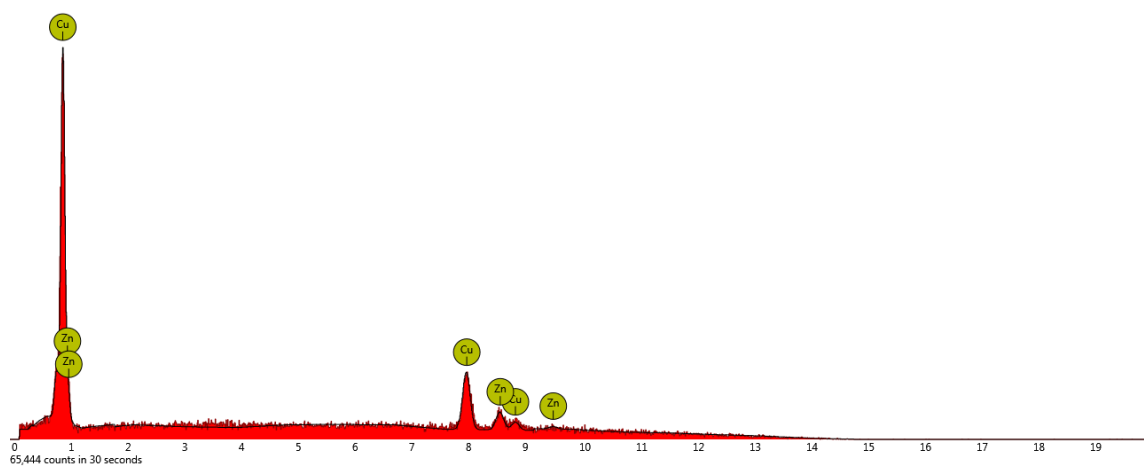

**Figure S8.** EDS spectrum of a polished admiralty brass sample.

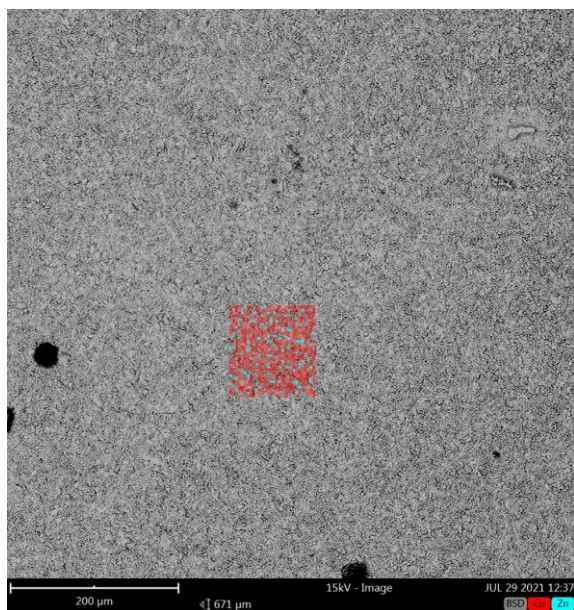

| Element Symbol | Atomic Conc. | Weight Conc. | Oxide Symbol | Stoich. Conc. |
|----------------|--------------|--------------|--------------|---------------|
| Cu             | 82.12        | 81.70        | Cu           | 82.12         |
| Zn             | 17.88        | 18.30        | Zn           | 17.88         |

FOV: 671 μm, Mode: 15kV - Image, Detector: BSD Full

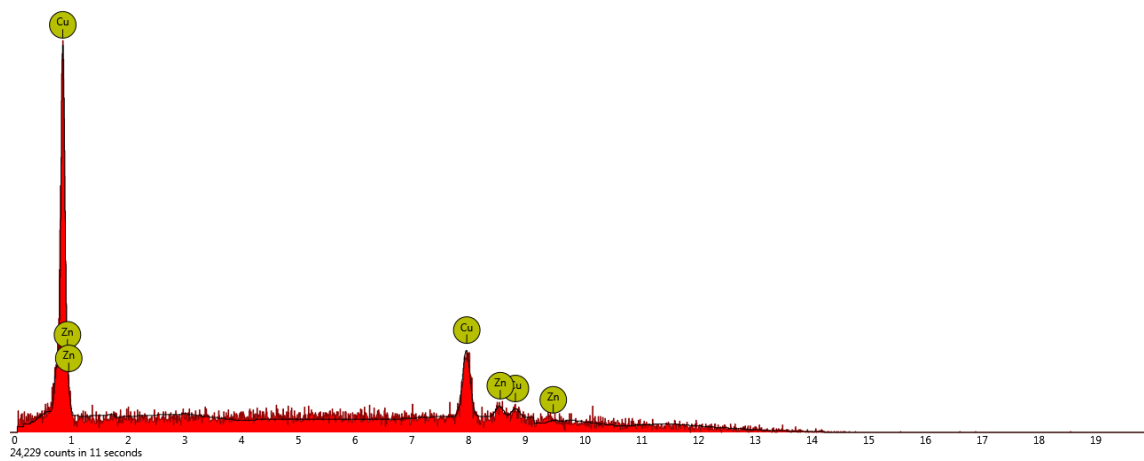

**Figure S9.** EDS spectrum of admiralty brass after immersion in 0.5 M HCl.

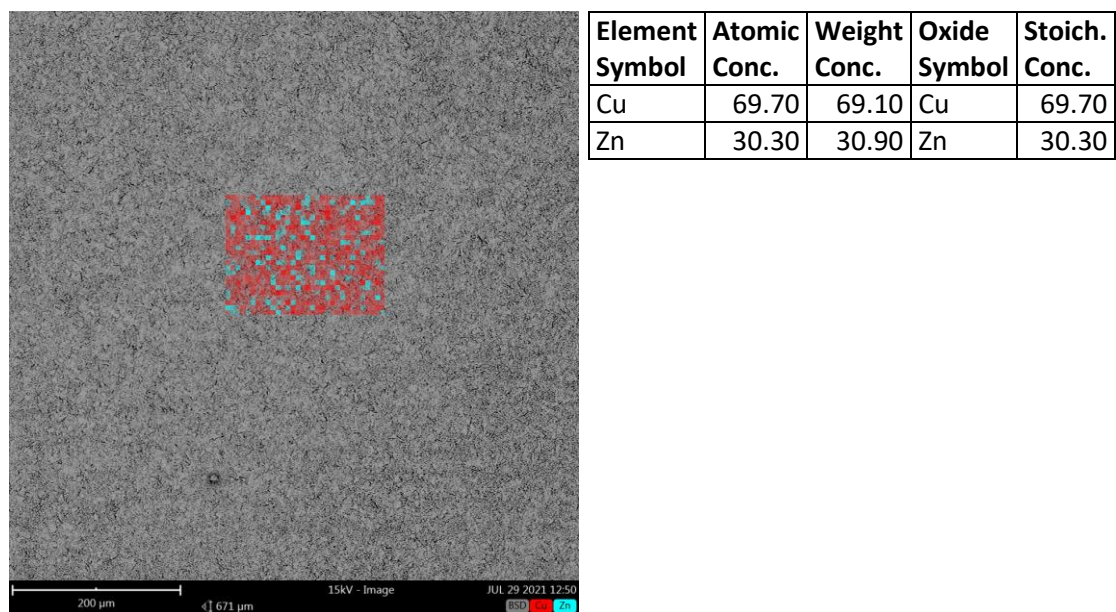

FOV: 671 μm, Mode: 15kV - Image, Detector: BSD Full

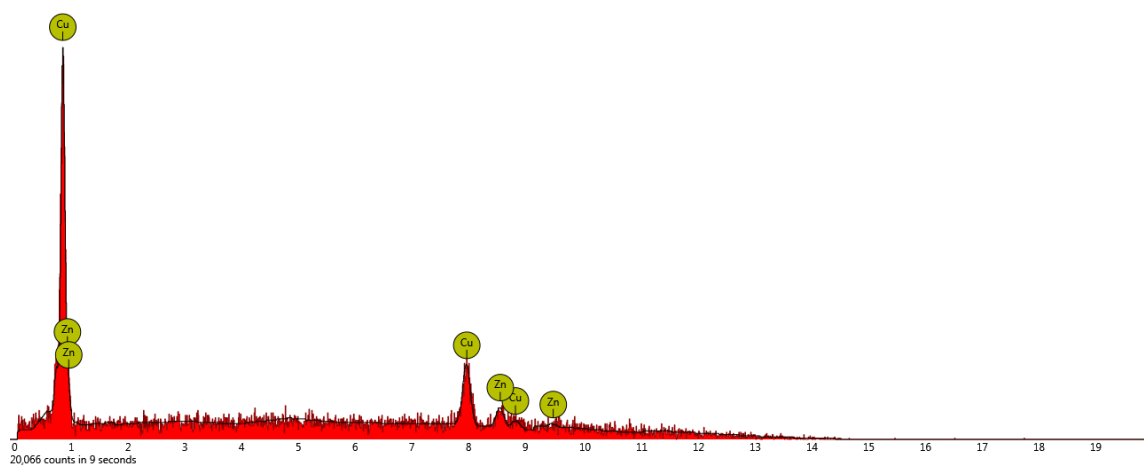

**Figure S10.** EDS spectrum of admiralty brass after immersion in 0.5 M HCl with 50 ppm CL2.

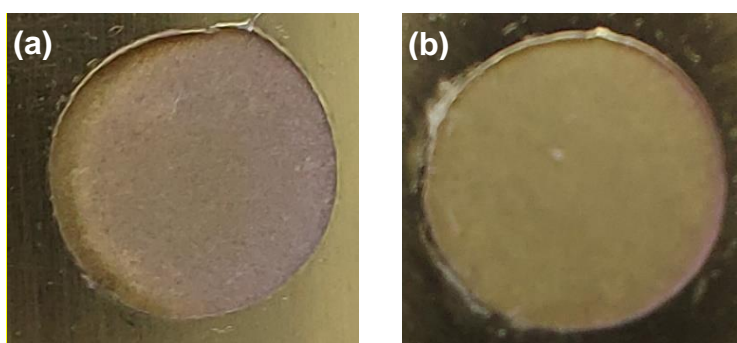

**Figure S11.** Photographs of admiralty brass after immersion in (a) 0.5 M HCl and (b) 0.5 M HCl with 50 ppm CL2.
